# Supplementary material for: The electronic and optical properties of novel germanene and antimonene heterostructures
Source: Royal Society of Chemistry journal article supplement (doi:10.1039/c6tc01141a), 2016-01-01
Supplement: c6tc01141a1.pdf [file c6tc01141a1.pdf]

## Supplementary Information

### The electronic and optical properties of novel germanene and antimonene heterostructure

Xianping Chen,<sup>\*abc†</sup>, Qun Yang,<sup>\*a†</sup> Ruishen Meng,<sup>a</sup> Junke Jiang,<sup>ab</sup> Qiuhua Liang,<sup>ab</sup>  
Chunjian Tan,<sup>bc</sup> and Xiang Sun<sup>bc</sup>

<sup>a</sup>Faculty of Mechanical and Electrical Engineering, Guilin University of Electronic Technology, 541004 Guilin, China. E-mail: xianpingchen1979@126.com; qunyang1993@126.com

<sup>b</sup>Key Laboratory of Optoelectronic Technology & Systems, Education Ministry of China, Chongqing University, 400044 Chongqing, China.

<sup>c</sup>College of Optoelectronic Engineering, Chongqing University, 400044 Chongqing, China.

<sup>†</sup>These authors contributed equally to this work.

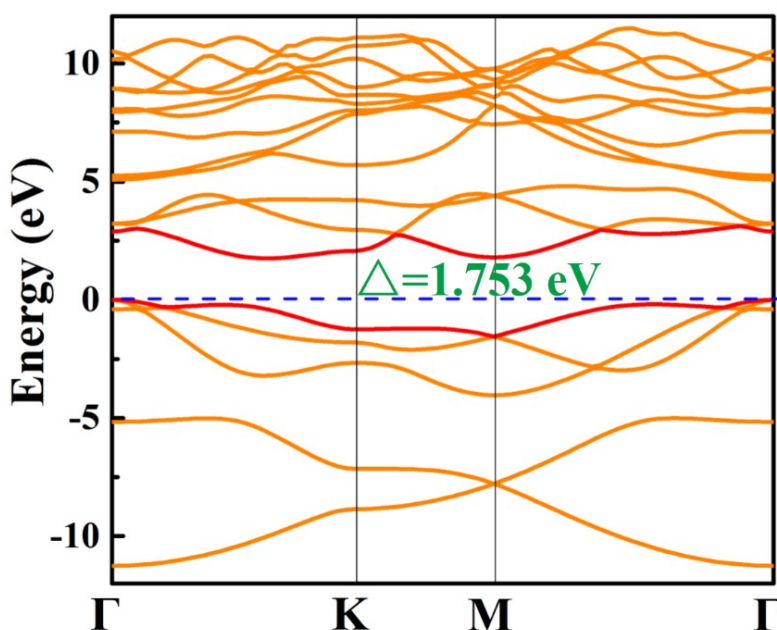

**Figure S1.** Electronic band structures of Sb monolayer (antimonene) calculated at the GGA/PBE level. Fermi level is set at 0 eV and represented by blue dashed line. The top of valence band (VBM) and bottom of conduction band (CBM) are highlighted with red lines.

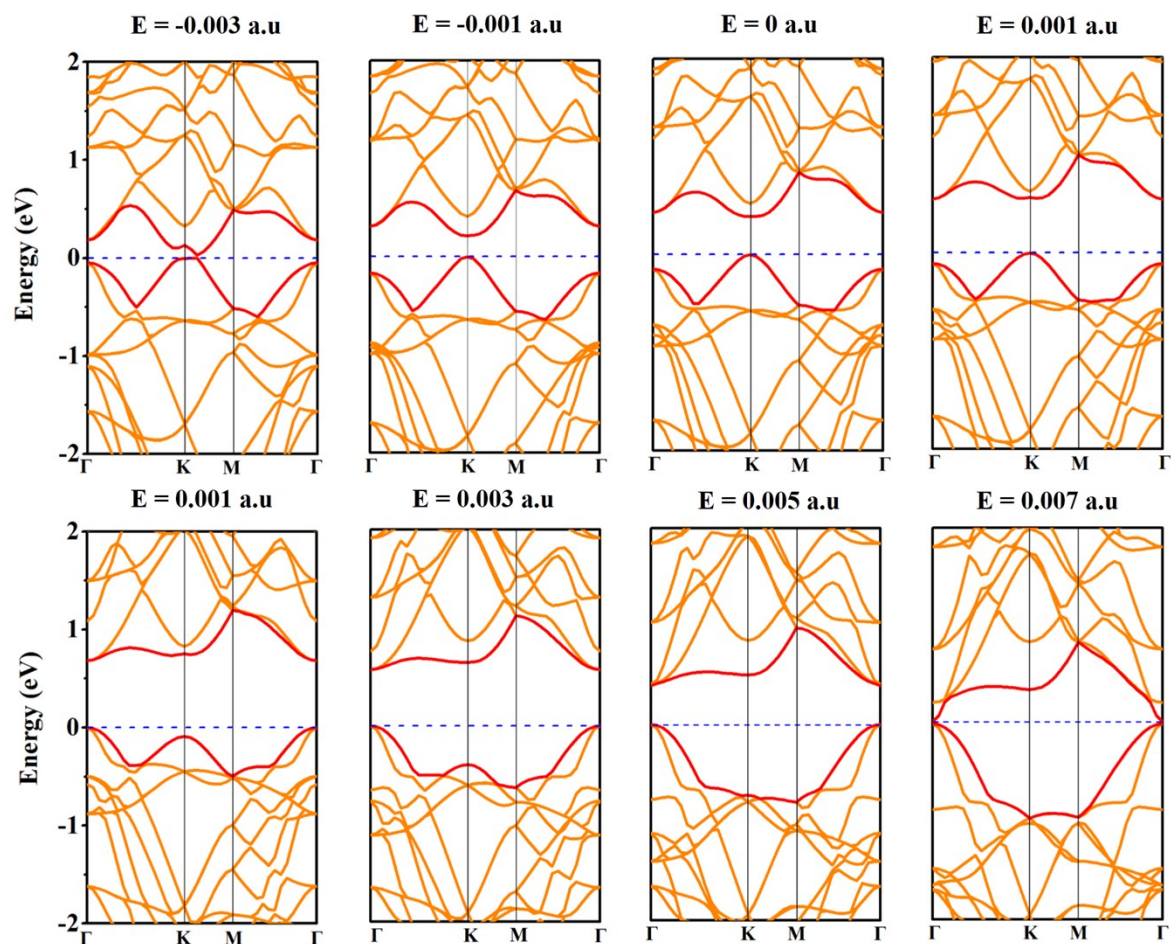

**Figure S2.** Electronic band structures of the germanene/antimonene bilayer in AAI pattern under different electric fields. The horizontal dash lines indicate the Fermi level.
